# Supplementary material for: A unifying model that explains the origins of human inverted copy number variants
Source: PubMed Central journal article supplement (PMC10766186; doi:10.1371/journal.pgen.1011091), 2024-01-04

S1\_Fig

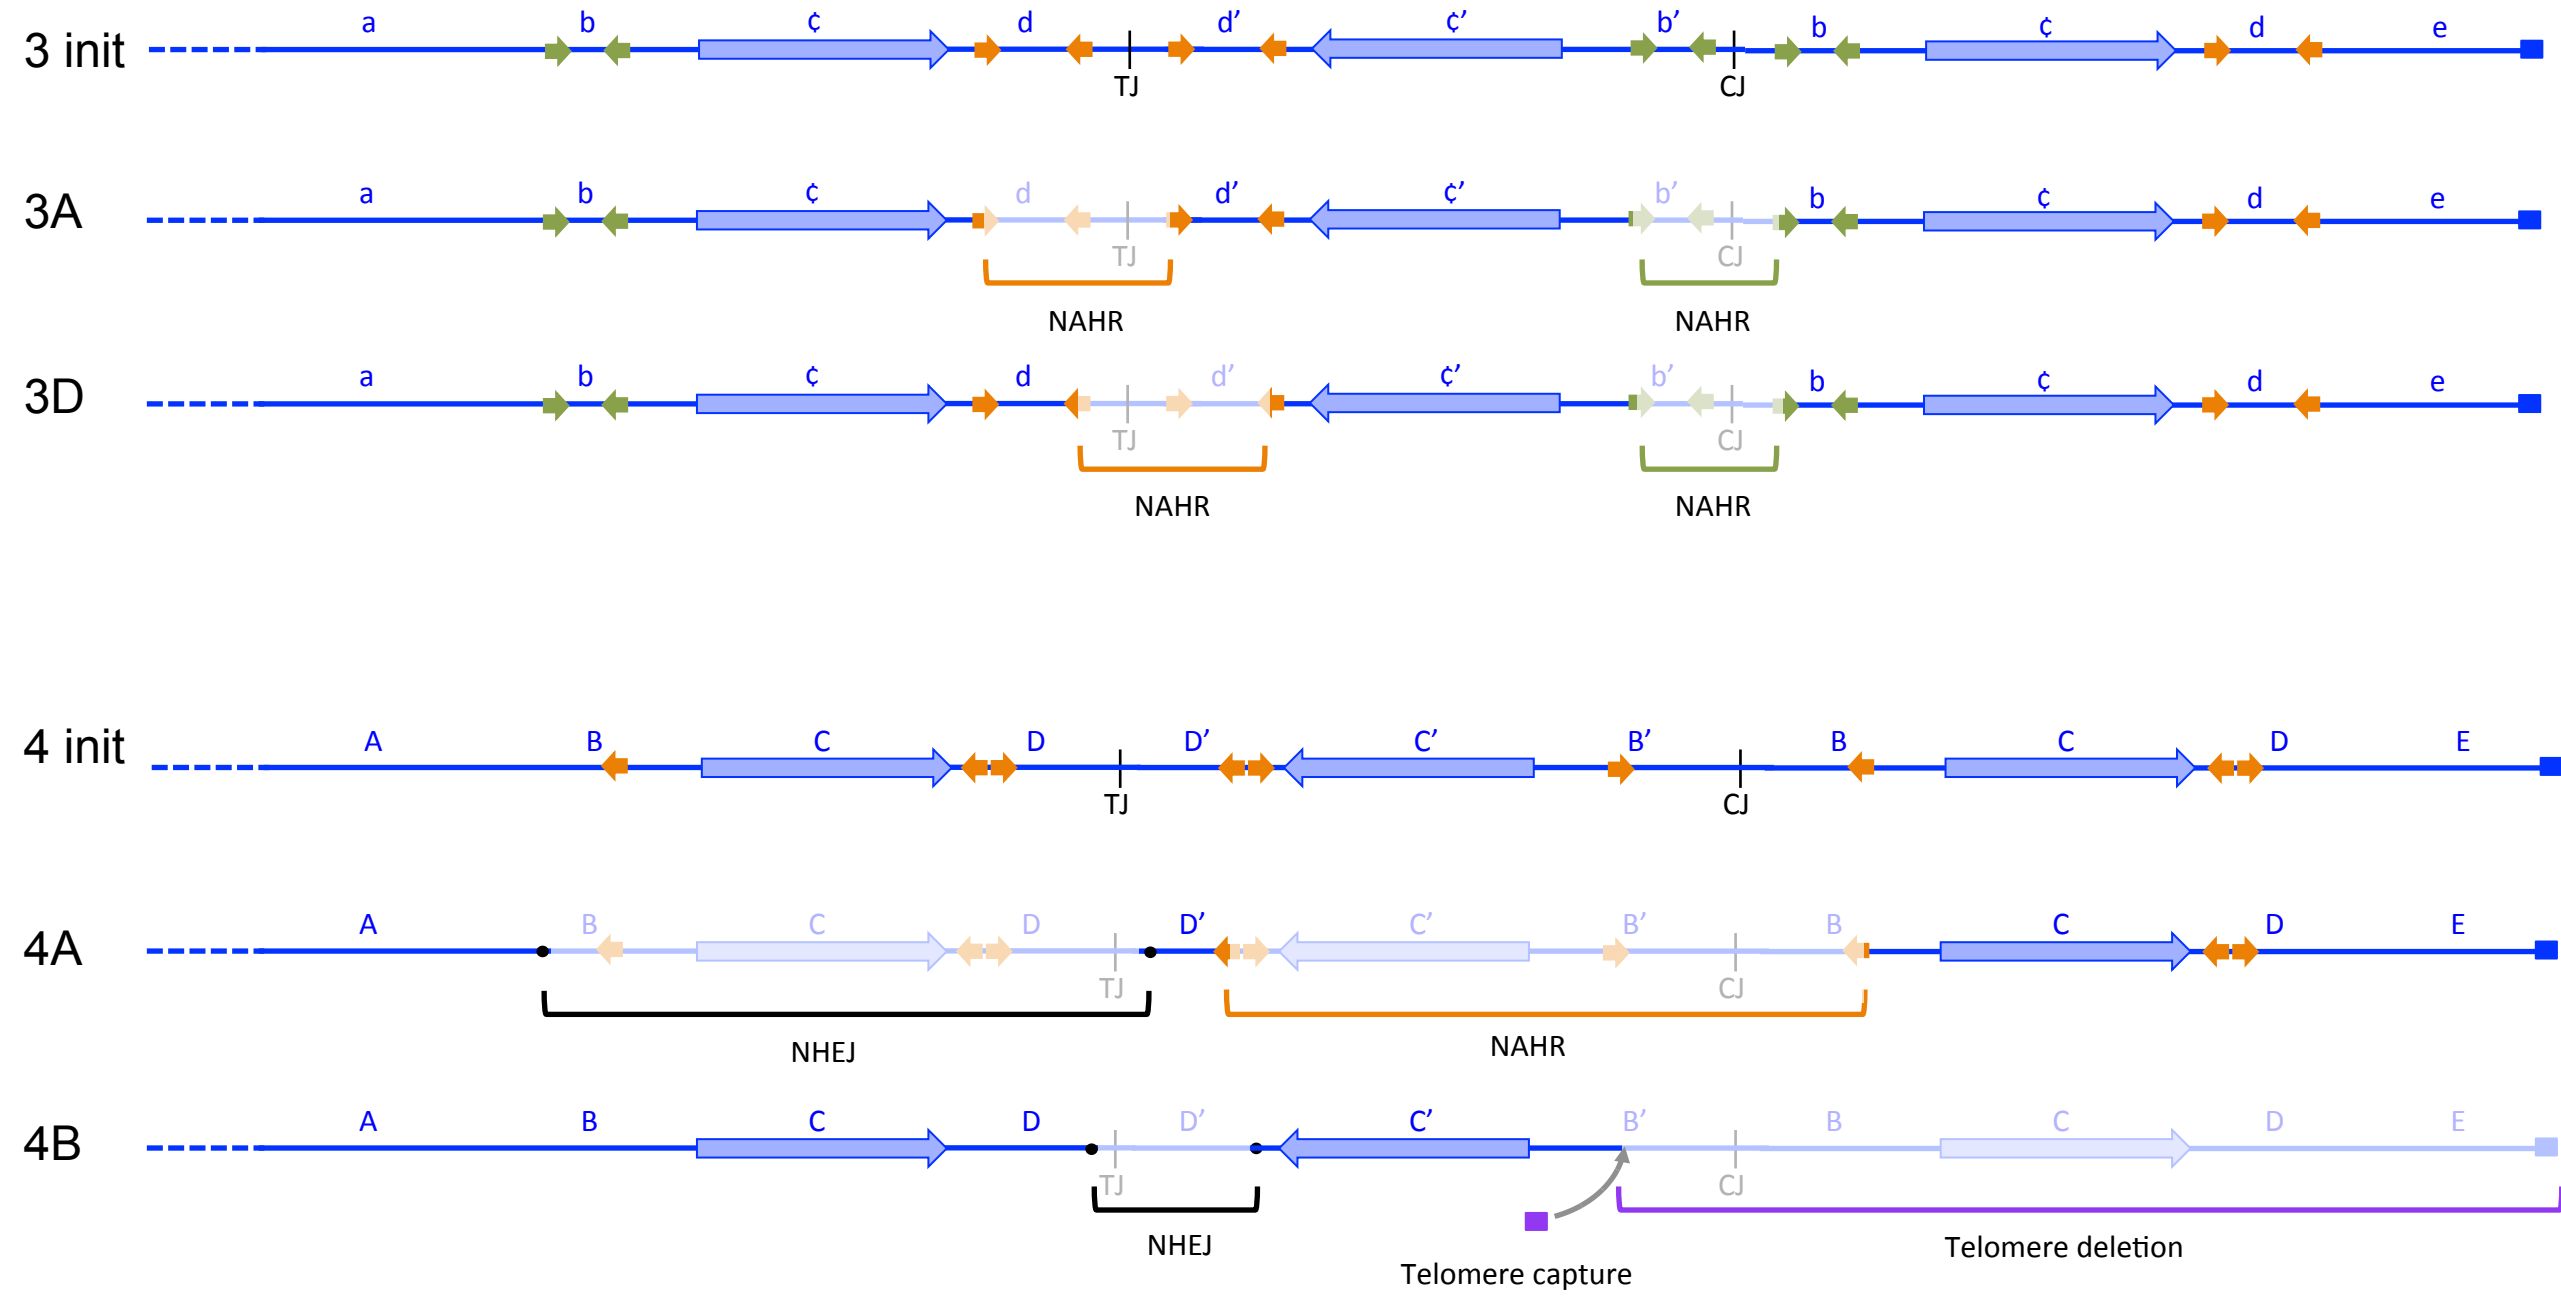

Supplement: pgen.1011091.s001.pdf [file pgen.1011091.s001.pdf]
